# Supplementary material for: Identification of the Ricin-B-Lectin LdRBLk in the Colorado Potato Beetle and an Analysis of Its Expression in Response to Fungal Infections
Source: MDPI journal article supplement (doi:10.3390/jof7050364), 2021-05-06

## Supplementary Materials

### Identification of the Ricin-B-lectin LdRBLk in the Colorado potato beetle and an analysis of its expression in response to fungal infections

**Table S1.** Amino acid and nucleotide sequences of LdRBLk.

| Title                    | Length | Sequence                                                                                                                                                                                                                                                                                                                                                                                                                              |
|--------------------------|--------|---------------------------------------------------------------------------------------------------------------------------------------------------------------------------------------------------------------------------------------------------------------------------------------------------------------------------------------------------------------------------------------------------------------------------------------|
| ORF sequence             | 127aa  | MSGIRIISKLSGLALDGNGSNVKAAMPNNTVGQIWSLESL<br>GDGTFVIHSYSDKNMVL DIEYGCHGENIILYPRHGDDNQQ<br>FYINSDGTIVSAGDRQKVLQMVRGKV VVRPVNISRNVDHI<br>FNIEQLF                                                                                                                                                                                                                                                                                         |
| DNA<br>sequence          | 381bp  | ATGTCAGGTATTCGGATCATATCGAAATTATCTGGATTAG<br>CTTTGGATGGAAATGGGAGCAACGTCAAAGCAGCAATGC<br>CTAATAACACCGTTGGCCAAATTTGGTCTCTGGAAAGTTT<br>GGGAGATGGAAC TTTTGT CATAACACAGTTATTCAGACAAG<br>AACATGGTACTAGATATTGAATATGGCTGCCATGGCGAAA<br>ATATCATACTATATCCAAGACATGGTGACGACAATCAACA<br>GTTCTACATCAATTCTGACGGGACAATTGTATCAGCTGGTG<br>ACAGACAGAAGGTTTTGCAAATGGTTAGAGGAAAAGTCGT<br>GGTGCGACCAGTGAACATTTTCGAGGAATGTCGATCACATTT<br>TCAACATCGAGCAACTATTT |
| qPCR product<br>sequence | 134bp  | TGGAAAGTTTGGGAGATGGAAC TTTTGT CATAACACAGTTATT<br>CAGACAAGAACATGGTCCTAGATATTGAATATGGCTGCCAT<br>GGTGAAAATATCATACTATATCCAAGACATGGTGACGACAA<br>TCAACAGTTC                                                                                                                                                                                                                                                                                 |

**Table 2.** List and description of genes and primers sequences used in the qPCR.

| Gene Name                                  | NCBI GenBank<br>Accession number<br>/Conserved Protein<br>Domain Family/ | Gene<br>symbol | Primer sequence (5' – 3')                                     | Product<br>size (bp) | PCR<br>efficiency<br>(±SD) | Tm in<br>qPCR,<br>°C | Primer's<br>source   |
|--------------------------------------------|--------------------------------------------------------------------------|----------------|---------------------------------------------------------------|----------------------|----------------------------|----------------------|----------------------|
| 60S ribosomal protein<br>L4                | XM_023165859.1                                                           | <i>Rp4</i>     | For GAAACGAGCATTGCCCTTCC<br>Rev TCGCTGACACTGTAGGGTTG          | 119                  | 1,97±0,06                  | 62                   | Shi et al<br>(2013)* |
| 60S ribosomal protein<br>L18               | XM_023172940.1                                                           | <i>Rp18</i>    | For TAGAATCCTCAAAGCAGGTGGC<br>Rev CTGGACCAAAGTGTT CACTGC      | 133                  | 1,96±0,04                  | 62                   | Shi et al<br>(2013)* |
| ADP-ribosylation factor-<br>like protein 1 | XM_023169879.1                                                           | <i>Arf19</i>   | For CGGTGCTGGTAAAACGACAATATT<br>Rev TGACCTCCCAAATCCCAAACCTT   | 135                  | 1,95±0,06                  | 62                   | Shi et al<br>(2013)* |
| ADP-ribosylation factor<br>4               | KC190027.1                                                               | <i>Arf2</i>    | For GTGCTCGCGAACCATGTGA<br>Rev AAACCTCCAATCCCTCGTGAAG         | 140                  | 2,00±0,01                  | 62                   | Shi et al<br>(2013)* |
| Ricin-B-lectin k                           | GEEF01084863.1<br>/pfam00652/                                            | <i>LdRBlk</i>  | For GAACTGTTGATTGTCGTCACCATG<br>Rev TGGAAAGTTTGGGAGATGGAAC    | 140                  | 1,96±0,04                  | 62                   | <sup>a</sup> ISaEA   |
| Attacin_C domain<br>contained protein      | XM_023168834.1<br>/pfam03769/                                            | <i>attacin</i> | For TGAGAACTCCACAAAATATTCACCTCG<br>Rev CTAAGGGTATGGCAGCAACAAC | 98                   | 1,90±0,07                  | 62                   | <sup>a</sup> ISaEA   |
| Heat shock protein 90                      | KC556802.1<br>/pfam00183 /                                               | <i>hsp90</i>   | For GGGTGTAGTCGACTCTGAAGAC<br>Rev AGAGCTCCTCAAACAGTTCCAA      | 125                  | 1,90±0,06                  | 62                   | <sup>a</sup> ISaEA   |

Shi, X.Q., Guo, W.C., Wan, P.J., Zhou, L.T., Ren, X.L., Ahmat, T., Fu, K.Y., Li, G.Q. Validation of reference genes for expression analysis by quantitative real-time PCR in *Leptinotarsa decemlineata* (Say). *BMC Res Notes* **2013**, 6, 93 doi: 10.1186/1756-0500-6-93 \* Primers were modified for this work by Rotskaya U. <sup>a</sup> Primers were designed by Rotskaya U. in programs Primer-BLAST <https://www.ncbi.nlm.nih.gov/tools/primer-blast/>, IDT OligoAnalyser Tool and IDT UNA Fold Tool <https://eu.idtdna.com> .

**Figure S1.** Tertiary structure of LdRBLk peptide constructed by I-TASSER program. The Model 1 (A) and the Model 2 (B).

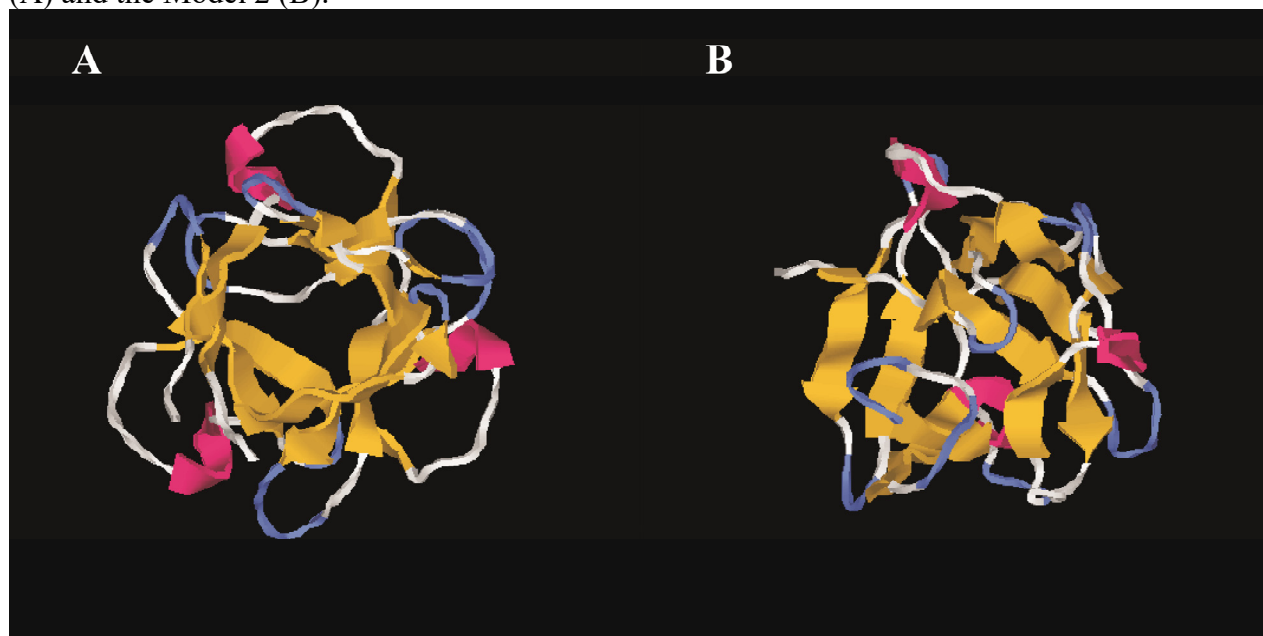

SignalP-5.0 prediction (Eukarya): LdRBLk

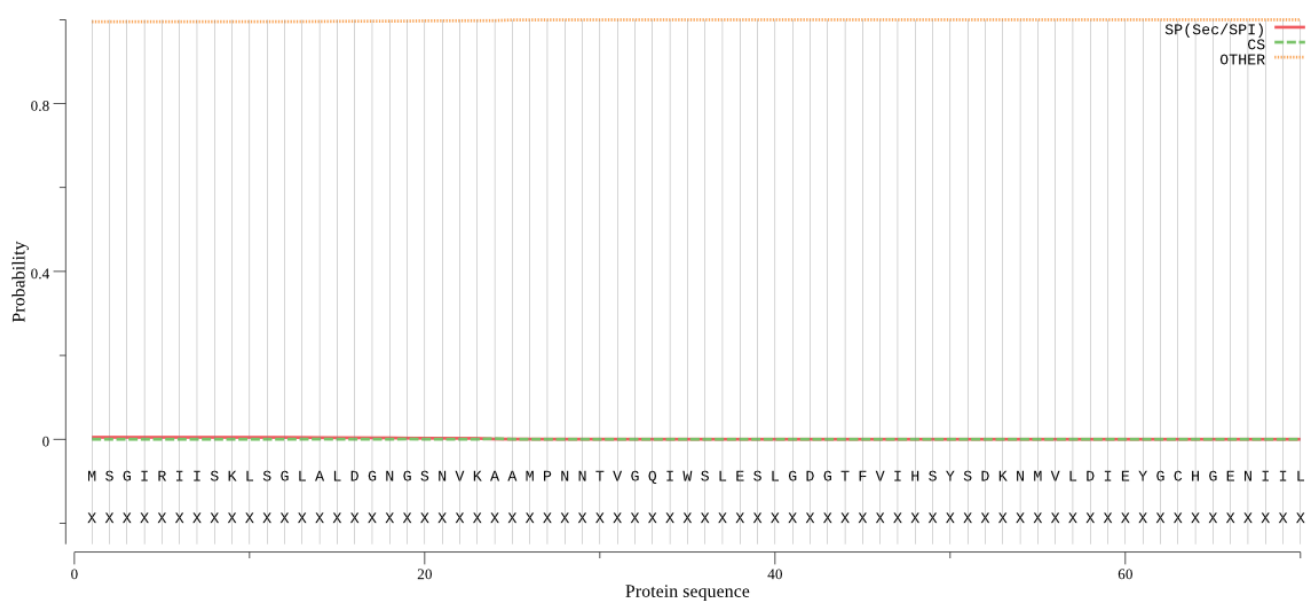

**Figure S3.** Prediction of the presence of a transmembrane domain in the LdRBLk peptide in the TMHMM online program. Possible transmembrane helices: inside to outside helices (i->o) 0 found, outside to inside helices (o->i) 0 found. Suggested models for transmembrane topology: no possible model found.

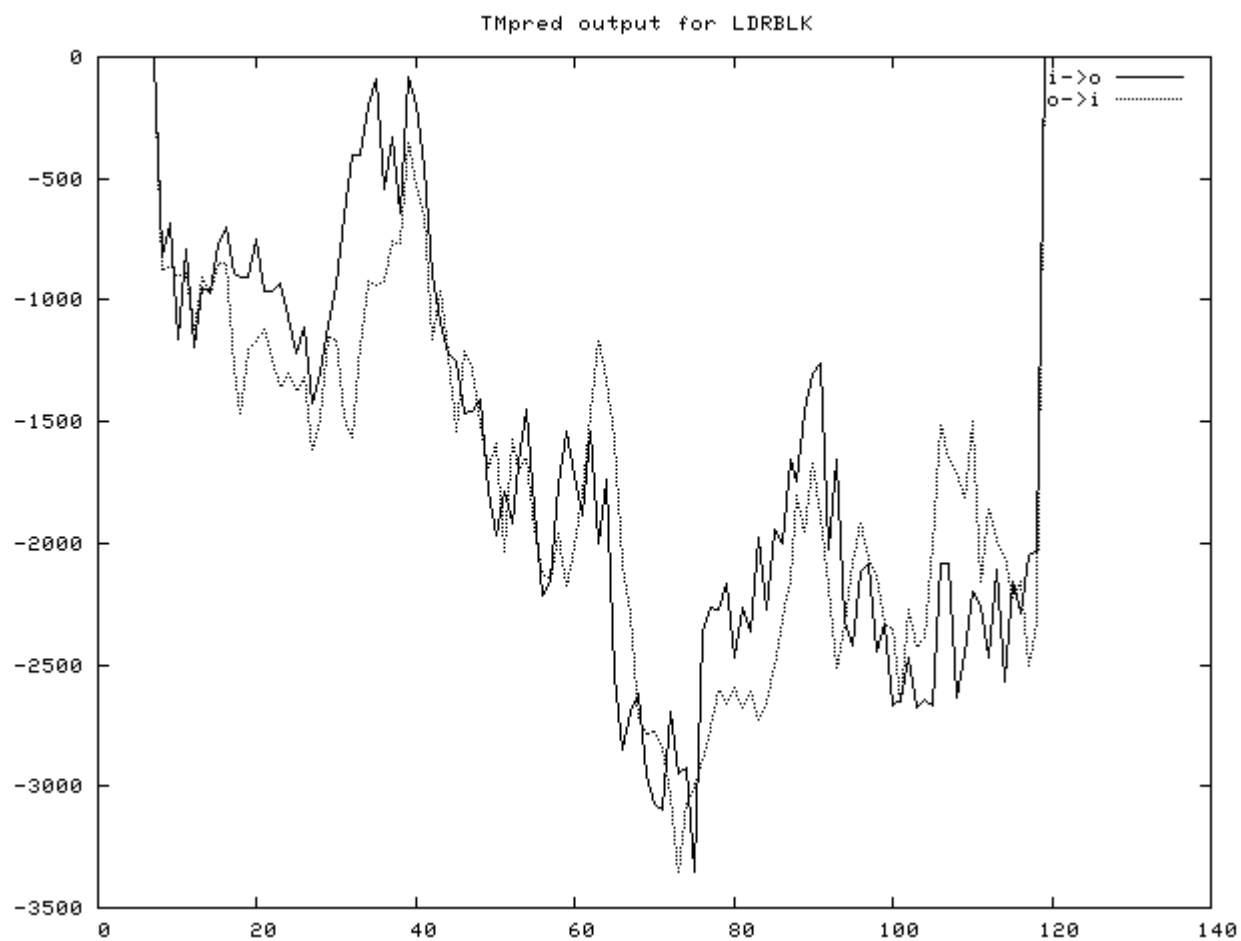

**Figure S4.** The analyze of hydrophilic property of LdRBLk peptide by the online program ProtScale using the Kyte-Doolittle (A) and the Hopp-Woods (B) algorithms.

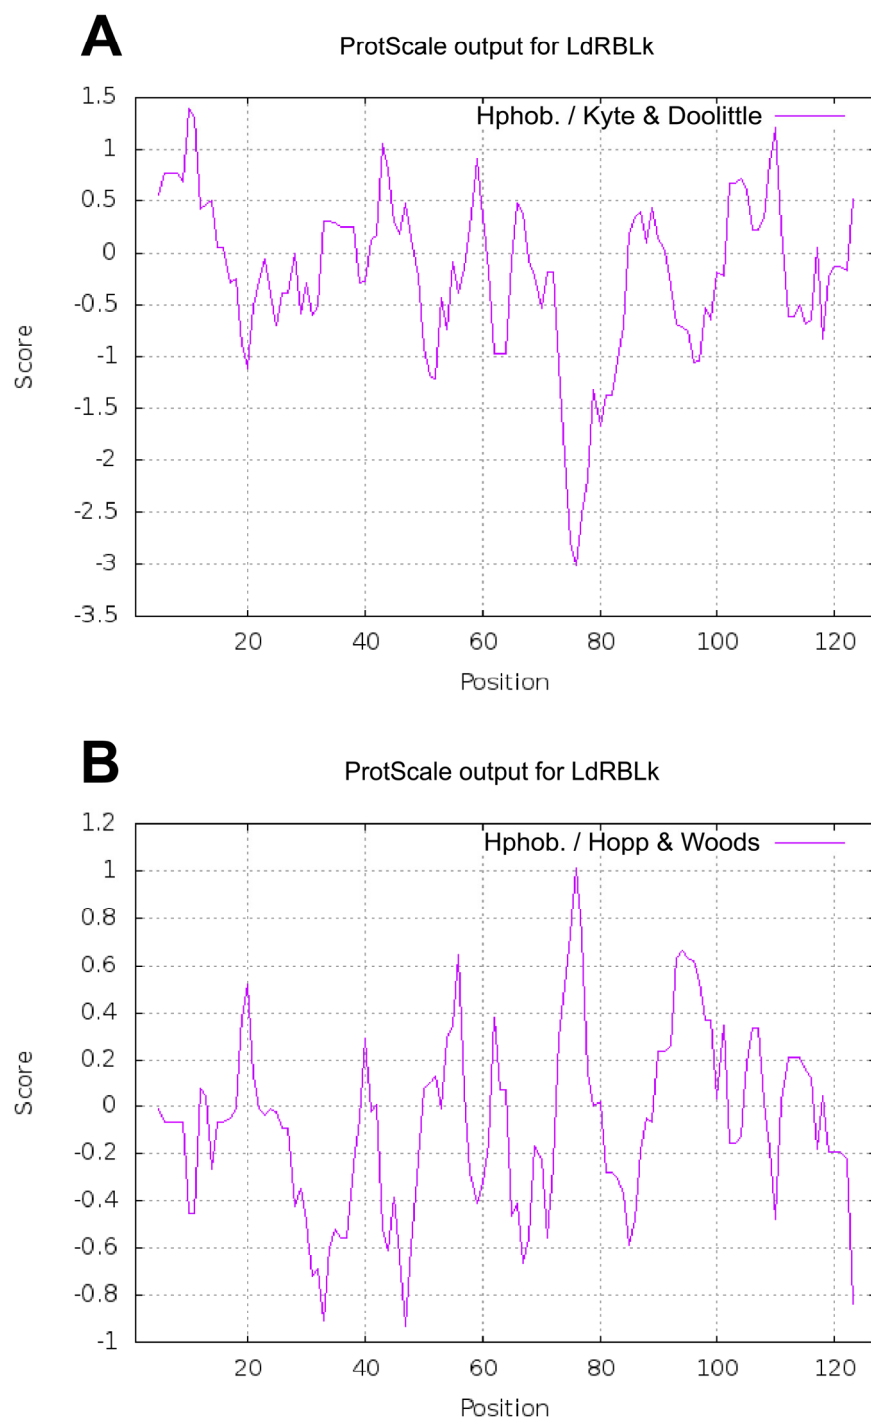

**Figure S5.** Multiple alignment of amino acid sequences of LdRBLs peptides of *L. decemlineata*. It was performed using the CLUSTAL algorithm in the MAFFT online program (v7.471).

CLUSTAL format alignment by MAFFT FFT-NS-i (v7.471)

```
LdRBLk          LVPS-----TFNIKMSG-----IRIISKLSGLALDGNNGSNVKAAMPNNTVGQIWSLE
XP_023029736.1  MATS-PVILFFIICISSMYCLADDYVIIQSKTSGMVLDGNHYYVRARLADGSIGQKWNLT
XP_023029739.1  MASN-SAILCFFICISSMYCLANAYIIIESKNSGLVLDGNEYNVRAMPADGSIGQKWTLT
XP_023029750.1  MASNFSSYLFFLVVIAILTCLTEAQVRIKSKKTGLVFQYNGTNVEVAEPNDSEGQKWILE
                :...      * : ::      : * ** :*::: *   *..   ::: ** * *
```

```
LdRBLk          SLGDGTFVIHSYSDKNMVLIDIEYGCH-GE--NIILYPRHGDDNQQFYINSDGTIVSAGDR
XP_023029736.1  STKIGRFIITN-ARNGHVLDVQHGCKLGNTSNVIVYKNHFGRNQEFYINSDGTIVSSCDN
XP_023029739.1  PSDTGRFVITN-ARNGHALDVQDGCEKGN--NLIVYQKHSGTNQLFYINSDGTIGSACNT
XP_023029750.1  CSQKGHFIINS-NKQGLAMDIKKGCKIGQ--SVMVYDKHSRQNQQFFINSDATIGTACDA
                * *:* .   :. .:*:: ** . *:   :::* .*   ** *:****.** :: :
```

```
LdRBLk          QKVLQMVRGKVVRPVNIS-RNVDHIFNIEQLF
XP_023029736.1  NEIIEMKDGKVEVCGKEEPCSSGDVFFKILETK
XP_023029739.1  DLIVEMKDSNGQLGDIQNSCSSGDVIFEIQAAQ
XP_023029750.1  NLILLVKDRNVEVAPRDNY-FDFDIHFEIEPIE
                : :: :   :   :   . * *:*
```

**Figure S6.** Multiple sequences alignment of Ricin-type  $\beta$ -trefoil lectin domain (pfam00652) contained proteins by hierarchical clustering algorithm.

Corpet, F. Multiple sequence alignment with hierarchical clustering. *Nucleic Acids Res.* **1988**, *16*, 10881-10890. doi:10.1093/nar/16.22.10881

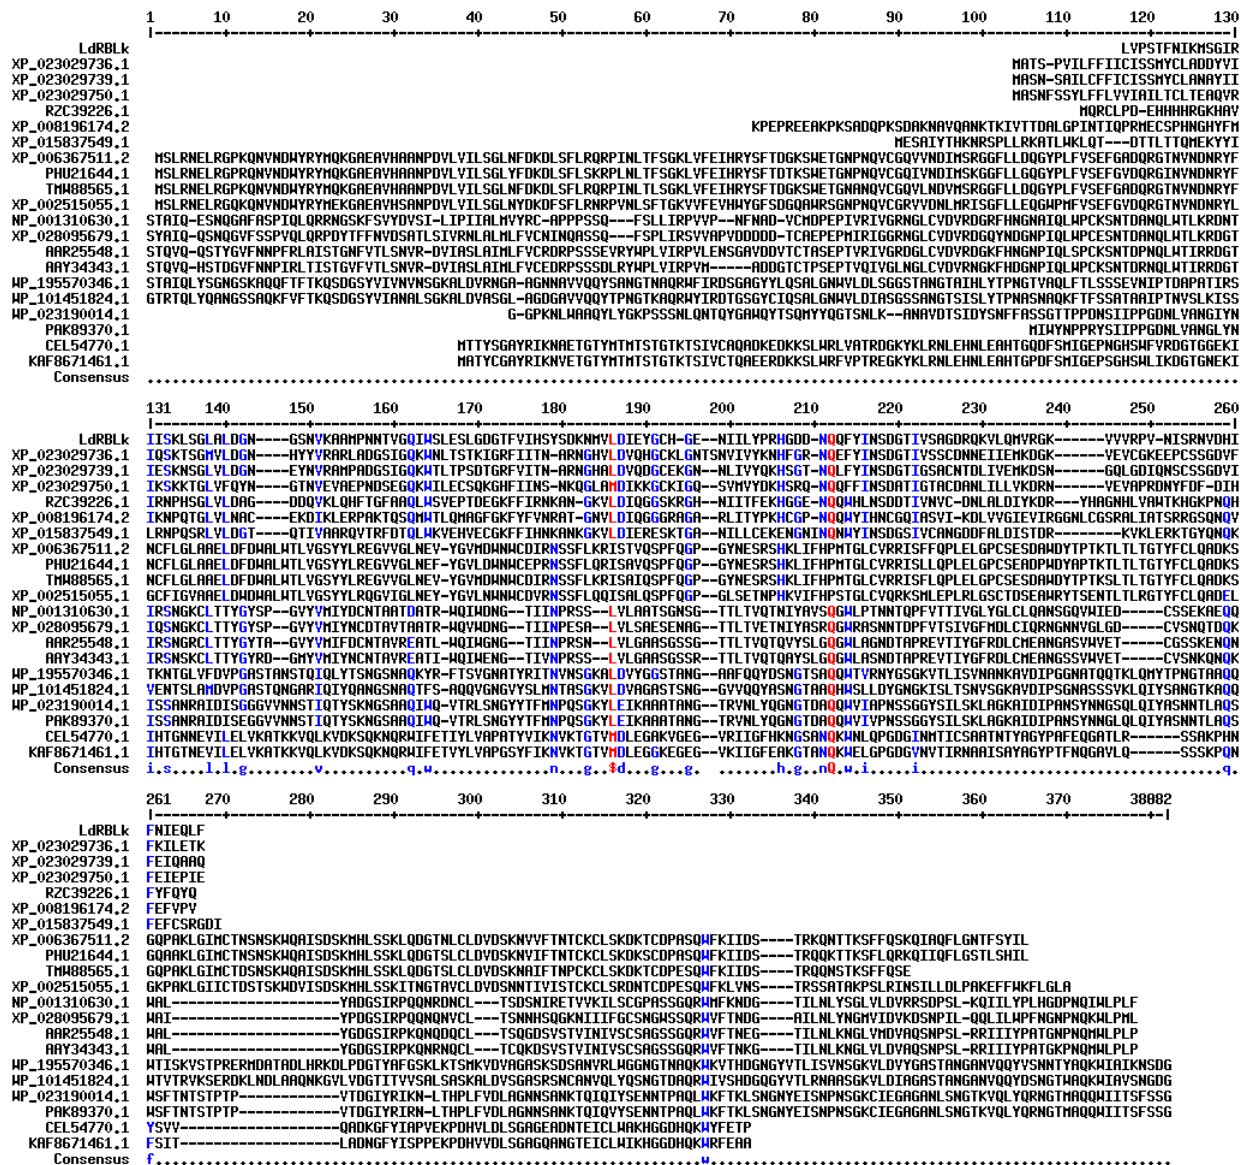



**Figure S7.** Predicted secondary and tertiary structure of  $\beta$ -lectin from *R. communis* ricin toxin (RBL). **A.** The secondary structure in the online SOPMA program. Strokes and lines are shown in blue, red, green and purple, representing an alpha helix, an extended strand, a beta turn, and a random coil, respectively. **B.** Tertiary structure of peptide constructed by I-TASSER program. The Model 1. **C.** Prediction of the ligand binding site for the RBL peptide by the I-TASSER program. The target ligand is galactose.

Sphyris, N., Lord, J.M., Wales, R., Roberts, L.M. Mutational analysis of the Ricinus lectin B-chains. Galactose-binding ability of the 2 gamma subdomain of Ricinus communis agglutinin B-chain. *J Biol. Chem.* **1995**, 35, 20292-20297. doi: 10.1074/jbc.270.35.20292. PMID: 7657599.

**A**

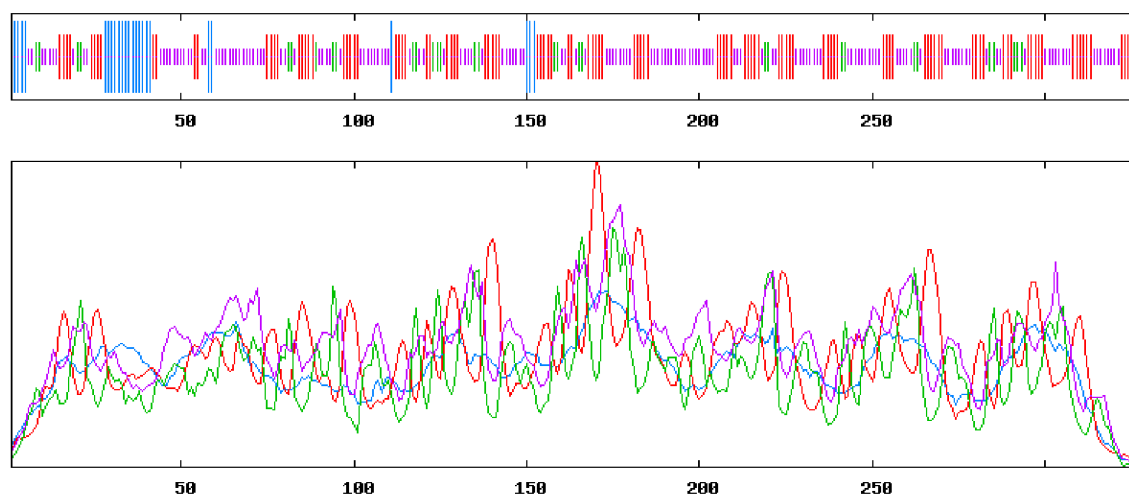

**B**

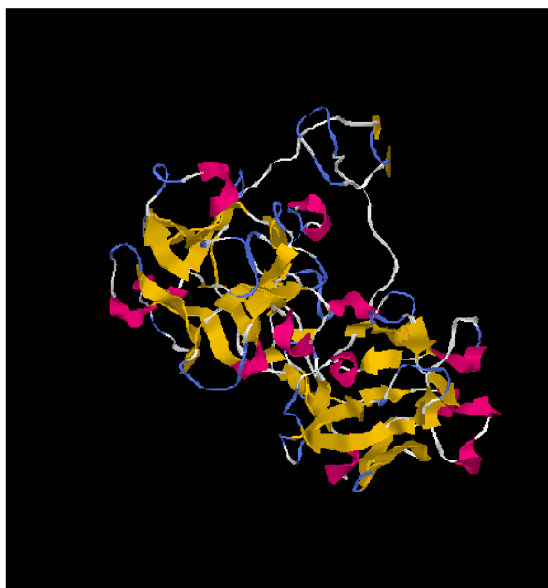

**C**

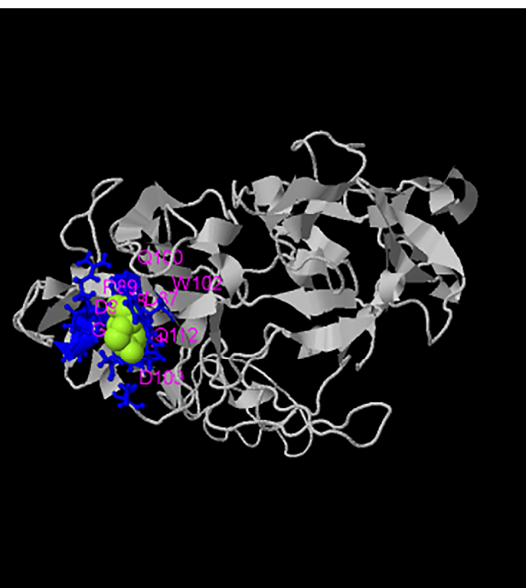

Supplement: s1 [file s1]
